# Supplementary material for: Improving the water-resistance of MgO-based metal–insulator–metal capacitors by inserting a BeO thin film grown via atomic layer deposition
Source: Royal Society of Chemistry journal article supplement (doi:10.1039/d2tc00595f), 2022-01-01
Supplement: d2tc00595f1.pdf [file d2tc00595f1.pdf]

# Supporting Information

## **Improving the water-resistance of MgO-based metal-insulator-metal capacitors by inserting BeO thin film grown via atomic layer deposition**

Bo Wen Wang, Seungsoo Kim, Haewon Song, Haengha Seo, Xiangyuan Li, Jin Myung Choi, Jinwoo Choi, Jonghoon Shin, and Cheol Seong Hwang\*

*Department of Materials Science and Engineering, and Inter-University Semiconductor Research Center, Seoul National University, Seoul 08826, Republic of Korea.*

\* Author for correspondence. E-mail: cheolsh@snu.ac.kr

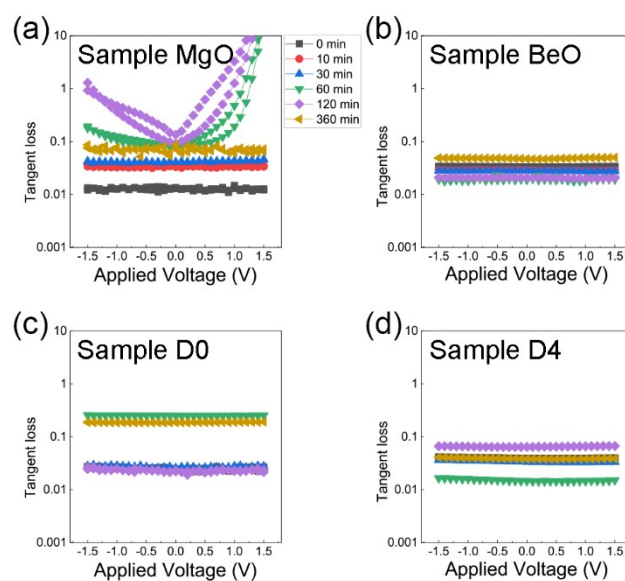

**Figure. S1** Tangent loss curves of (a) single MgO, (b) single BeO, and MgO/BeO stack-based metal-insulator-metal capacitors (c) without annealing and (d) with annealing, varying with water immersion time. The physical thickness for the as-deposited single MgO film and BeO/MgO/BeO/MgO/BeO films was  $\sim 10$ – $11$  nm. D0 were samples without annealing while D4 were samples with annealing BeO/MgO/BeO/MgO/BeO (2/2/2/2/2 nm) stacks.

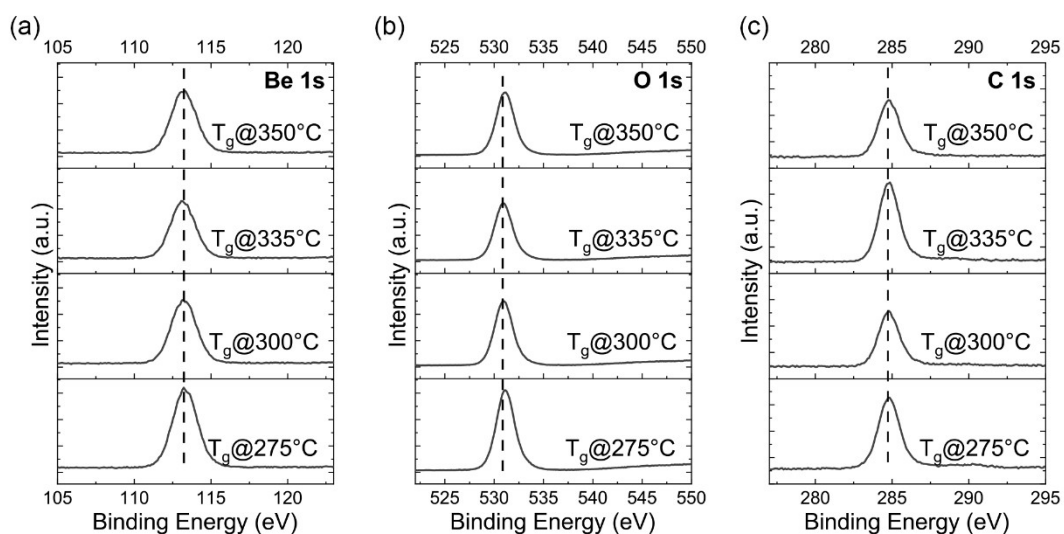

**Figure S2.** High-resolution X-ray photoelectron spectroscopy (XPS) scan of (a) Be 1s, (b) O 1s, and (c) C 1s for BeO films deposited by ozone-based ALD as function of growth temperature ( $T_g$ ). The ALD cycle numbers were of 175. BeO films were deposited on top of Si substrate.

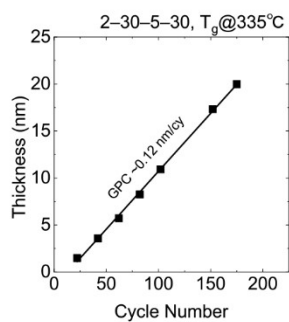

**Figure S3.** . Diethyl beryllium as precursor and ozone as oxygen source Film thickness as a function of ALD cycle number of ozone-based process at growth temperature ( $T_g$ ) of 335°C. BeO films were deposited on top of Si substrate.

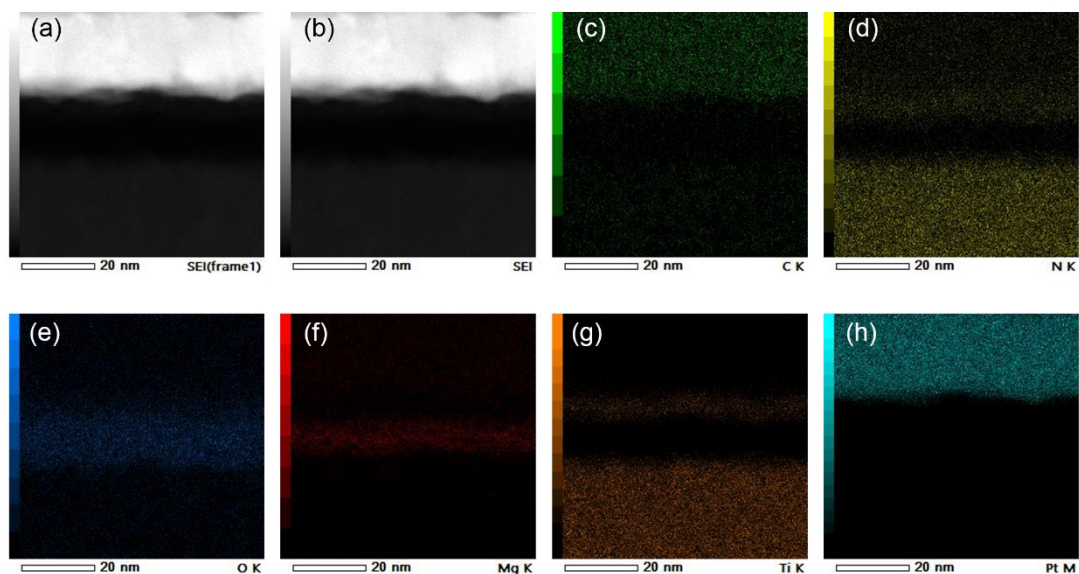

**Figure S4.** Secondary electron image (SEI) of (a) before and (b) after mapping. (c–h) Elemental mapping by energy-dispersive X-ray spectroscopy in scanning transmission electron microscopy mode. The adopted sample fabricated via focus ion beam method was top-TiN/BeO/MgO/BeO/MgO/BeO/bottom-TiN (sample D0, without water immersion). The physical thickness of BeO/MgO/BeO/MgO/BeO films was  $\sim 10$  nm.

**Table S1.** Atomic ratio calculated from XPS scan of samples BeO in Figure S2.

| Atomic Ratio | 275°C | 300°C | 335°C | 350°C |
|--------------|-------|-------|-------|-------|
| Be           | 43.9  | 44.3  | 42.6  | 44.7  |
| O            | 46.9  | 47.1  | 44.7  | 46.7  |
| C            | 9.2   | 8.6   | 12.7  | 8.7   |
| Be/O         | 0.936 | 0.941 | 0.951 | 0.957 |

**Table S2.** Atomic ratio calculated from XPS scan of samples MgO, D0, D4 in Figure 6.

| Atomic Ratio | MgO-0 | D0   | D4   |
|--------------|-------|------|------|
| Mg/Be        | -     | 0.13 | 0.08 |
| Mg/O         | 1.41  | 0.14 | 0.1  |
| Be/O         | -     | 1.15 | 1.21 |
| Metal/O      | -     | 1.29 | 1.3  |
